# Supplementary material
Source: publisher site journal article supplement (https://www.dovepress.com/article/407708)

## Supplementary Material

**Supplementary Table 1** Characteristics of chronic obstructive pulmonary disease patients in the validation cohort

| Variables                      | Validation cohort |
|--------------------------------|-------------------|
|                                | (N = 178)         |
| Age, y                         | 74±10             |
| ≥65                            | 150 (84)          |
| Male gender                    | 161 (90)          |
| Current smoker                 | 24 (14)           |
| BMI, kg/m <sup>2</sup>         | 23.8±3.9          |
| <18.5                          | 14 (7.9)          |
| 18.5~24.9                      | 94 (53)           |
| >24.9                          | 70 (39)           |
| mMRC dyspnea scale             |                   |
| ≥2                             | 99 (56)           |
| Comorbidities                  |                   |
| Hypertension                   | 42 (24)           |
| Coronary artery disease        | 13 (7.3)          |
| Diabetes mellitus              | 10 (5.6)          |
| Exacerbations in prior 1 y     | 27 (15)           |
| FEV <sub>1</sub> , % predicted |                   |
| ≥50                            | 142 (80)          |
| <50                            | 36 (20)           |

**Notes:**

**Abbreviations:** BMI, body mass index; FEV<sub>1</sub>, force expiratory volume at 1 s; mMRC, modified Medical Research Council.

**Supplementary Figure 1** Kaplan–Meier curves for the composite adverse outcome of chronic obstructive pulmonary disease patients in the validation cohort, stratified by the established cutoff of (A) 6-minute walk distance (6MWD), % predicted, (B) pace variability, and (C) both 6MWD, % predicted and pace variability.

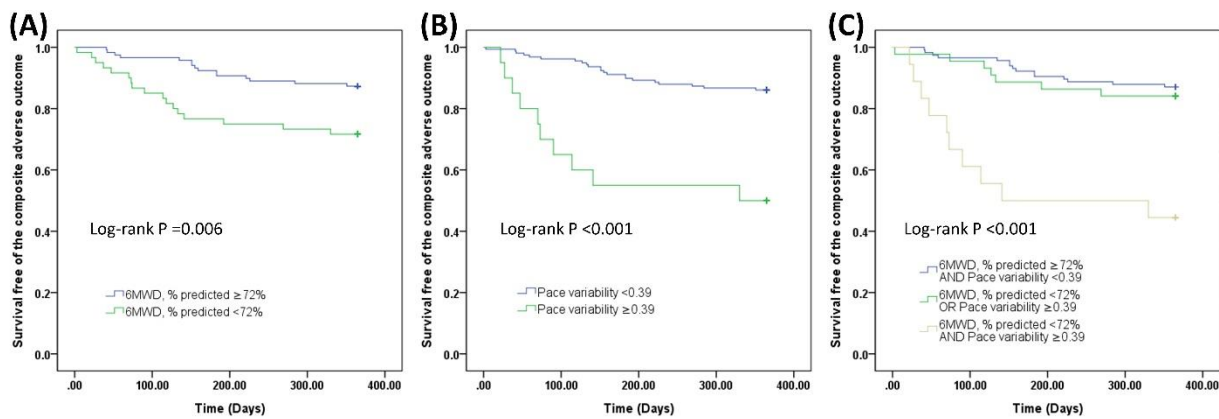

Supplement: Supplementary file 1 [file get_supplementary_file.php]
